# Supplementary material for: Excimer formation of 6-(1-pyrenyl)hexyl-11(1-pyrenyl)undecanoate within an ionic liquid and cosolvent-modified ionic liquid mixture
Source: Royal Society of Chemistry journal article supplement (doi:10.1039/c2cp44167e), 2012-12-07
Supplement: c2cp44167e.pdf [file c2cp44167e.pdf]

## **Electronic Supporting Information (ESI)**

### **Excimer formation of 6-(1-pyrenyl)hexyl-11(1-pyrenyl) undecanoate within ionic liquid and cosolvent modified ionic liquid mixture**

Rewa Rai<sup>a</sup> and Siddharth Pandey<sup>a\*</sup>

<sup>a</sup>*Department of Chemistry, Indian Institute of Technology Delhi, Hauz Khas, New Delhi –  
110016, India.*

\*Corresponding Author. Phone: +91-11-26596503, Fax: +91-11-26581102,

E-mail: [sipandey@chemistry.iitd.ac.in](mailto:sipandey@chemistry.iitd.ac.in)

**Table S1.** Recovered best global fitted intensity decay parameters for **1** dissolved in [bmim][PF<sub>6</sub>], TEG and their equimolar mixture at different temperatures.

| T (°C)     | $\lambda_{em}(nm)$ | $\tau_1(ns)$ | $\tau_2(ns)$ | $\tau_3(ns)$ | $\alpha_1$ | $\alpha_2$ | $\alpha_3$ | $\chi^2$ |
|------------|--------------------|--------------|--------------|--------------|------------|------------|------------|----------|
| <b>TEG</b> |                    |              |              |              |            |            |            |          |
| 10         | 378                | 131          |              |              | 1.00       |            |            | 4.76     |
|            | 480                | 131          |              |              | 1.00       |            |            | 10.58    |
|            | 378                | 114          | 60.6         |              | 0.99       | 0.01       |            | 0.99     |
|            | 480                | 114          | 60.6         |              | 0.57       | -0.43      |            | 2.41     |
|            | 378                | 112          | 59.1         | 431          | 0.87       | 0.12       | -0.01      | 1.01     |
|            | 480                | 112          | 59.1         | 431          | 0.57       | -0.43      | 0.00       | 1.93     |
| 30         | 378                | 100          |              |              | 1.00       |            |            | 12.16    |
|            | 480                | 100          |              |              | 1.00       |            |            | 26.43    |
|            | 378                | 68.4         | 49.2         |              | 0.90       | 0.10       |            | 1.02     |
|            | 480                | 68.4         | 49.2         |              | 0.52       | -0.48      |            | 1.30     |
|            | 378                | 67.2         | 48.7         | 2.1          | 0.84       | 0.01       | 0.15       | 1.01     |
|            | 480                | 67.2         | 48.7         | 2.1          | 0.49       | -0.47      | 0.04       | 0.98     |
| 50         | 378                | 82.6         |              |              | 1.00       |            |            | 25.62    |
|            | 480                | 82.6         |              |              | 1.00       |            |            | 46.37    |

| T (°C) | $\lambda_{em}(nm)$ | $\tau_1(ns)$ | $\tau_2(ns)$ | $\tau_3(ns)$ | $\alpha_1$ | $\alpha_2$ | $\alpha_3$ | $\chi^2$ |
|--------|--------------------|--------------|--------------|--------------|------------|------------|------------|----------|
| 50     | 378                | 48.4         | 32.9         |              | 0.37       | 0.63       |            | 1.00     |
|        | 480                | 48.4         | 32.9         |              | 0.51       | -0.49      |            | 1.30     |
|        | 378                | 51.0         | 26.7         | 5.6          | 0.50       | 0.41       | 0.09       | 0.96     |
|        | 480                | 51.0         | 26.7         | 5.6          | 0.48       | -0.47      | 0.05       | 1.02     |
| 70     | 378                | 54.6         |              |              | 1.00       |            |            | 24.33    |
|        | 480                | 54.6         |              |              | 1.00       |            |            | 35.16    |
|        | 378                | 40.9         | 17.2         |              | 0.39       | 0.61       |            | 1.04     |
|        | 480                | 40.9         | 17.2         |              | 0.52       | -0.48      |            | 1.02     |
|        | 378                | 39.4         | 13.8         | 8.5          | 0.44       | 0.52       | 0.03       | 0.94     |
|        | 480                | 39.4         | 13.8         | 8.5          | 0.36       | -0.48      | 0.16       | 0.89     |
| 90     | 378                | 42.0         |              |              | 1.00       |            |            | 13.90    |
|        | 480                | 42.0         |              |              | 1.00       |            |            | 20.81    |
|        | 378                | 36.1         | 8.2          |              | 0.49       | 0.51       |            | 1.01     |
|        | 480                | 36.1         | 8.2          |              | 0.54       | -0.46      |            | 1.02     |
|        | 378                | 34.4         | 10.1         | 34.0         | 0.49       | 0.03       | -0.48      | 0.94     |
|        | 480                | 34.4         | 10.1         | 34.0         | -0.39      | -0.10      | 0.51       | 0.77     |

| T (°C)                        | $\lambda_{em}(nm)$ | $\tau_1(ns)$ | $\tau_2(ns)$ | $\tau_3(ns)$ | $\alpha_1$ | $\alpha_2$ | $\alpha_3$ | $\chi^2$ |
|-------------------------------|--------------------|--------------|--------------|--------------|------------|------------|------------|----------|
| <b>[bmim][PF<sub>6</sub>]</b> |                    |              |              |              |            |            |            |          |
| 10                            | 378                | 124          |              |              | 1.00       |            |            | 1.60     |
|                               | 480                | 124          |              |              | 1.00       |            |            | 4.42     |
|                               | 378                | 115          | 54.2         |              | 0.99       | 0.01       |            | 1.10     |
|                               | 480                | 115          | 54.2         |              | 0.63       | -0.37      |            | 3.12     |
|                               | 378                | 116          | 40.0         | 3.3          | 0.93       | 0.06       | 0.01       | 1.03     |
|                               | 480                | 116          | 40.0         | 3.3          | 0.34       | -0.25      | 0.41       | 1.02     |
| 30                            | 378                | 102          |              |              | 1.00       |            |            | 4.52     |
|                               | 480                | 102          |              |              | 1.00       |            |            | 10.14    |
|                               | 378                | 82.8         | 43.1         |              | 0.97       | 0.03       |            | 1.00     |
|                               | 480                | 82.8         | 43.1         |              | 0.56       | -0.44      |            | 1.76     |
|                               | 378                | 84.8         | 35.3         | 2.5          | 0.82       | 0.07       | 0.11       | 0.96     |
|                               | 480                | 84.8         | 35.3         | 2.5          | 0.44       | -0.37      | 0.19       | 1.02     |
| 50                            | 378                | 81.1         |              |              | 1.00       |            |            | 11.83    |
|                               | 480                | 81.1         |              |              | 1.00       |            |            | 24.61    |
|                               | 378                | 57.5         | 33.1         |              | 0.87       | 0.13       |            | 1.02     |
|                               | 480                | 57.5         | 33.1         |              | 0.54       | -0.46      |            | 1.49     |

| T (°C) | $\lambda_{em}(nm)$ | $\tau_1(ns)$ | $\tau_2(ns)$ | $\tau_3(ns)$ | $\alpha_1$ | $\alpha_2$ | $\alpha_3$ | $\chi^2$ |
|--------|--------------------|--------------|--------------|--------------|------------|------------|------------|----------|
| 50     | 378                | 52.4         | 32.2         | 2.0          | 0.85       | 0.01       | 0.14       | 0.89     |
|        | 480                | 52.4         | 32.2         | 2.0          | 0.49       | -0.45      | 0.06       | 0.89     |
| 70     | 378                | 55.1         |              |              | 1.00       |            |            | 18.16    |
|        | 480                | 55.1         |              |              | 1.00       |            |            | 31.41    |
|        | 378                | 36.1         | 22.9         |              | 0.75       | 0.25       |            | 1.00     |
|        | 480                | 36.1         | 22.9         |              | 0.52       | -0.48      |            | 1.11     |
|        | 378                | 36.0         | 21.2         | 4.1          | 0.73       | 0.17       | 0.11       | 0.98     |
|        | 480                | 36.0         | 21.2         | 4.1          | 0.49       | -0.47      | 0.04       | 0.91     |
| 90     | 378                | 40.5         |              |              | 1.00       |            |            | 21.16    |
|        | 480                | 40.5         |              |              | 1.00       |            |            | 26.99    |
|        | 378                | 27.4         | 13.9         |              | 0.59       | 0.41       |            | 1.02     |
|        | 480                | 27.4         | 13.9         |              | 0.53       | -0.47      |            | 1.01     |
|        | 378                | 29.0         | 14.1         | 14.3         | 0.50       | 0.50       | 0.00       | 0.91     |
|        | 480                | 29.0         | 14.1         | 14.3         | 0.54       | -0.46      | 0.00       | 0.90     |

| T (°C)                                                  | $\lambda_{em}(nm)$ | $\tau_1(ns)$ | $\tau_2(ns)$ | $\tau_3(ns)$ | $\alpha_1$ | $\alpha_2$ | $\alpha_3$ | $\chi^2$ |
|---------------------------------------------------------|--------------------|--------------|--------------|--------------|------------|------------|------------|----------|
| <b>Equimolar mixture ([bmim][PF<sub>6</sub>] + TEG)</b> |                    |              |              |              |            |            |            |          |
| 10                                                      | 378                | 138          |              |              | 1.00       |            |            | 2.65     |
|                                                         | 480                | 138          |              |              | 1.00       |            |            | 7.77     |
|                                                         | 378                | 118          | 55.4         |              | 0.99       | 0.01       |            | 1.06     |
|                                                         | 480                | 118          | 55.4         |              | 0.51       | -0.49      |            | 2.90     |
|                                                         | 378                | 120          | 43.0         | 3.1          | 0.93       | 0.02       | 0.05       | 1.01     |
|                                                         | 480                | 120          | 43.0         | 3.1          | 0.36       | -0.29      | 0.35       | 1.01     |
| 30                                                      | 378                | 121          |              |              | 1.00       |            |            | 11.51    |
|                                                         | 480                | 121          |              |              | 1.00       |            |            | 30.80    |
|                                                         | 378                | 78.7         | 50.0         |              | 0.99       | 0.01       |            | 1.04     |
|                                                         | 480                | 78.7         | 50.0         |              | 0.53       | -0.47      |            | 1.89     |
|                                                         | 378                | 80.1         | 40.2         | 2.2          | 0.87       | 0.05       | 0.08       | 0.90     |
|                                                         | 480                | 80.1         | 40.2         | 2.2          | 0.46       | -0.42      | 0.11       | 0.97     |
| 50                                                      | 378                | 79.8         |              |              | 1.00       |            |            | 23.34    |
|                                                         | 480                | 79.8         |              |              | 1.00       |            |            | 45.29    |
|                                                         | 378                | 49.5         | 35.2         |              | 0.76       | 0.24       |            | 1.04     |
|                                                         | 480                | 49.5         | 35.2         |              | 0.51       | -0.49      |            | 1.25     |

| T (°C) | $\lambda_{em}(nm)$ | $\tau_1(ns)$ | $\tau_2(ns)$ | $\tau_3(ns)$ | $\alpha_1$ | $\alpha_2$ | $\alpha_3$ | $\chi^2$ |
|--------|--------------------|--------------|--------------|--------------|------------|------------|------------|----------|
| 50     | 378                | 46.6         | 32.5         | 2.8          | 0.90       | 0.01       | 0.09       | 0.91     |
|        | 480                | 46.6         | 32.5         | 2.8          | 0.50       | -0.48      | 0.03       | 0.91     |
| 70     | 378                | 55.9         |              |              | 1.00       |            |            | 30.38    |
|        | 480                | 55.9         |              |              | 1.00       |            |            | 42.77    |
|        | 378                | 33.9         | 21.2         |              | 0.55       | 0.45       |            | 0.98     |
|        | 480                | 33.9         | 21.2         |              | 0.52       | -0.48      |            | 1.09     |
|        | 378                | 35.8         | 17.2         | 6.6          | 0.56       | 0.39       | 0.05       | 0.89     |
|        | 480                | 35.8         | 17.2         | 6.6          | 0.45       | -0.47      | 0.08       | 0.94     |
| 90     | 378                | 37.7         |              |              | 1.00       |            |            | 18.98    |
|        | 480                | 37.7         |              |              | 1.00       |            |            | 25.88    |
|        | 378                | 28.1         | 11.0         |              | 0.49       | 0.51       |            | 0.99     |
|        | 480                | 28.1         | 11.0         |              | 0.53       | -0.47      |            | 1.00     |
|        | 378                | 24.1         | 14.1         | 14.0         | 0.01       | 0.50       | 0.50       | 0.69     |
|        | 480                | 24.1         | 14.1         | 14.0         | 0.17       | -0.49      | 0.33       | 0.76     |

**Table S2.** Decay parameters ( $\tau_1$ ,  $\tau_2$  and  $A = \alpha_{12}/\alpha_{11}$ ) for **1** dissolved in [bmim][PF<sub>6</sub>], TEG and their equimolar mixture at different temperatures based on Scheme 2.

| T (°C)                                                  | $\tau_1$ (ns)     | $\tau_2$ (ns)     | A    |
|---------------------------------------------------------|-------------------|-------------------|------|
| <b>[bmim][PF<sub>6</sub>]</b>                           |                   |                   |      |
| 10                                                      | 114 ( $\pm$ 2)    | 61.0 ( $\pm$ 0.4) | 0.02 |
| 30                                                      | 83.5 ( $\pm$ 1.3) | 44.2 ( $\pm$ 2.2) | 0.06 |
| 50                                                      | 58.1 ( $\pm$ 1.5) | 32.6 ( $\pm$ 1.0) | 0.17 |
| 70                                                      | 37.7 ( $\pm$ 3.2) | 23.2 ( $\pm$ 0.6) | 0.40 |
| 90                                                      | 27.7 ( $\pm$ 0.7) | 13.7 ( $\pm$ 0.4) | 0.69 |
| <b>Equimolar Mixture ([bmim][PF<sub>6</sub>] + TEG)</b> |                   |                   |      |
| 10                                                      | 120 ( $\pm$ 4)    | 56.8 ( $\pm$ 1.8) | 0.01 |
| 30                                                      | 79.2 ( $\pm$ 1.0) | 49.3 ( $\pm$ 1.4) | 0.03 |
| 50                                                      | 50.9 ( $\pm$ 1.4) | 34.2 ( $\pm$ 2.0) | 0.30 |
| 70                                                      | 34.4 ( $\pm$ 1.0) | 21.0 ( $\pm$ 0.5) | 0.86 |
| 90                                                      | 28.1 ( $\pm$ 1.0) | 11.3 ( $\pm$ 0.5) | 0.99 |
| <b>TEG</b>                                              |                   |                   |      |
| 10                                                      | 111 ( $\pm$ 7)    | 61.0 ( $\pm$ 0.8) | 0.04 |
| 30                                                      | 69.2 ( $\pm$ 2.0) | 48.5 ( $\pm$ 1.5) | 0.17 |
| 50                                                      | 49.9 ( $\pm$ 3.0) | 31.2 ( $\pm$ 1.8) | 1.46 |
| 70                                                      | 41.2 ( $\pm$ 1.5) | 17.0 ( $\pm$ 0.4) | 1.60 |
| 90                                                      | 35.7 ( $\pm$ 1.6) | 8.4 ( $\pm$ 0.3)  | 1.11 |



**Table S3.** Fluorescence lifetimes ( $\tau_0$ ) and excited-state intensity decay rates ( $k_M = 1/\tau_0$ ) for 1-methylpyrene dissolved in [bmim][PF<sub>6</sub>], TEG and their equimolar mixture at different temperatures.

| T (°C)                                                  | $\tau_0$ (ns) | $k_M$ (10 <sup>6</sup> , s <sup>-1</sup> ) |
|---------------------------------------------------------|---------------|--------------------------------------------|
| <b>[bmim][PF<sub>6</sub>]</b>                           |               |                                            |
| 10                                                      | 137 (± 2)     | 7.3 (± 0.1)                                |
| 30                                                      | 131 (± 2)     | 7.7 (± 0.1)                                |
| 50                                                      | 107 (± 1)     | 9.3 (± 0.1)                                |
| 70                                                      | 100 (± 1)     | 10.1 (± 0.1)                               |
| 90                                                      | 82 (± 3)      | 12.2 (± 0.2)                               |
| <b>Equimolar mixture ([bmim][PF<sub>6</sub>] + TEG)</b> |               |                                            |
| 10                                                      | 139 (± 4)     | 7.2 (± 0.2)                                |
| 30                                                      | 127 (± 8)     | 7.9 (± 0.5)                                |
| 50                                                      | 110 (± 8)     | 9.1 (± 0.7)                                |
| 70                                                      | 98 (± 1)      | 10.2 (± 0.1)                               |
| 90                                                      | 83 (± 2)      | 12.1 (± 0.3)                               |
| <b>TEG</b>                                              |               |                                            |
| 10                                                      | 140 (± 1)     | 7.2 (± 0.1)                                |
| 30                                                      | 131 (± 3)     | 7.7 (± 0.2)                                |
| 50                                                      | 124 (± 1)     | 8.1 (± 0.1)                                |
| 70                                                      | 135 (± 2)     | 7.4 (± 0.1)                                |
| 90                                                      | 130 (± 1)     | 7.7 (± 0.1)                                |

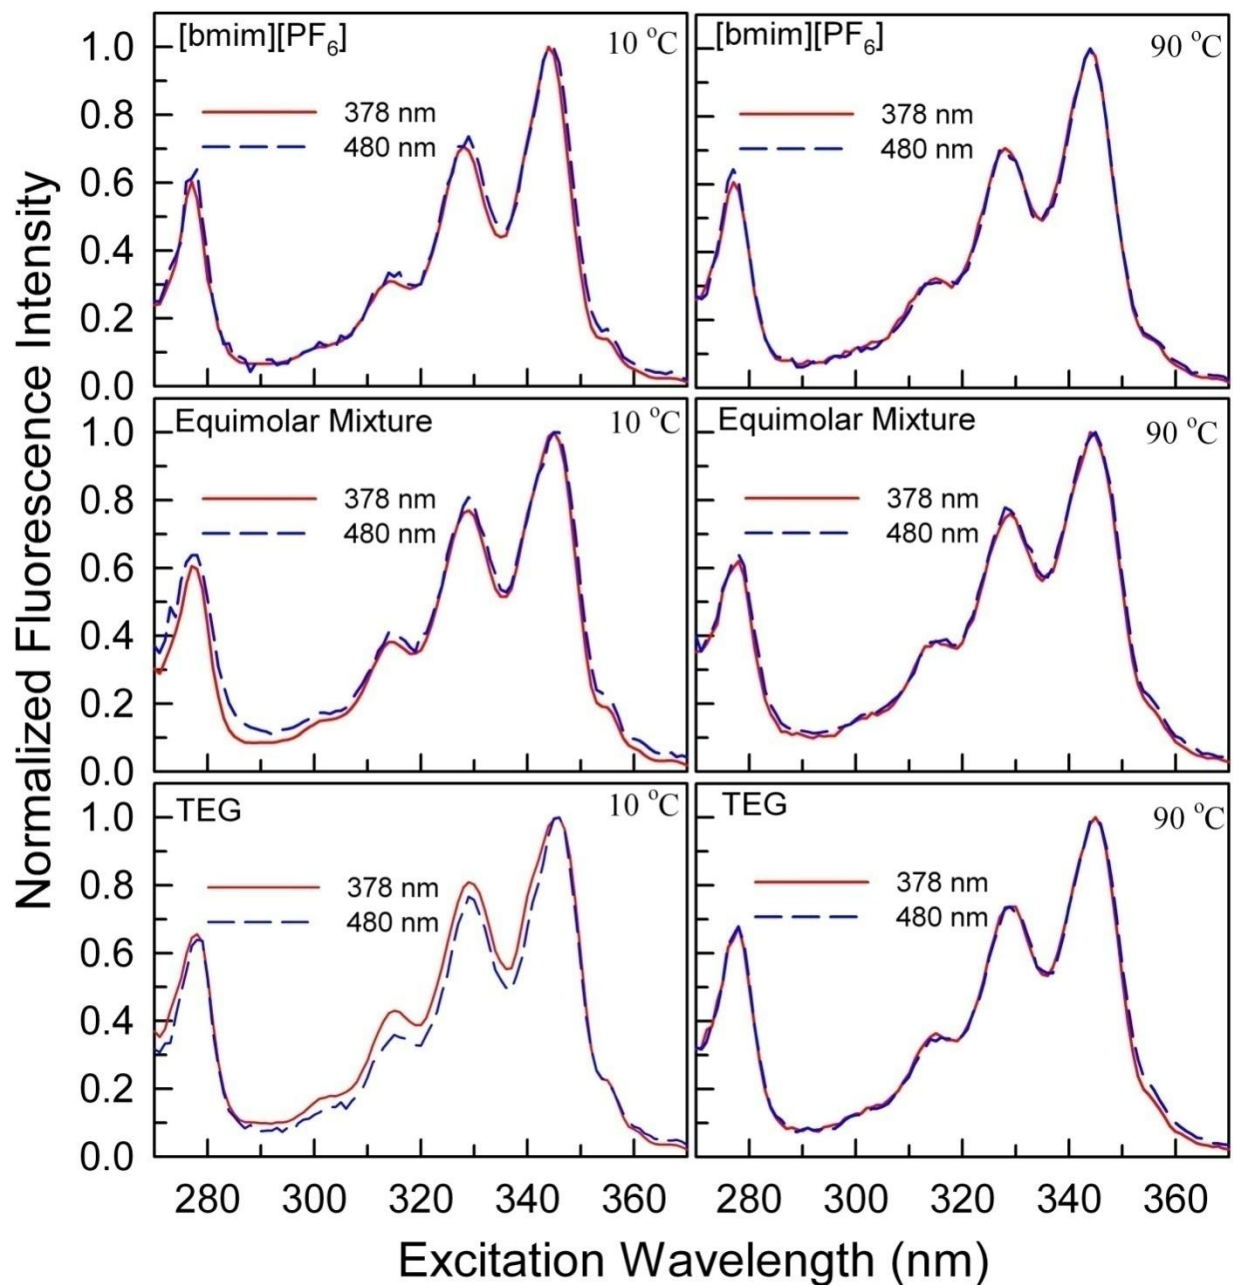

**Figure S1.** Normalized steady-state emission wavelength-dependent excitation spectra of **1** dissolved in [bmim][PF<sub>6</sub>] (top two panels), equimolar mixture (middle two panels) and TEG (bottom two panels) when emission is monitored at 378 nm (—) and 480 nm (---) at 10 °C (left panels) and 90 °C (right panels).
